# Supplementary material for: hnRNPA2 mediated acetylation reduces telomere length in response to mitochondrial dysfunction
Source: PubMed Central journal article supplement (PMC6241121; doi:10.1371/journal.pone.0206897), 2018-11-14

A

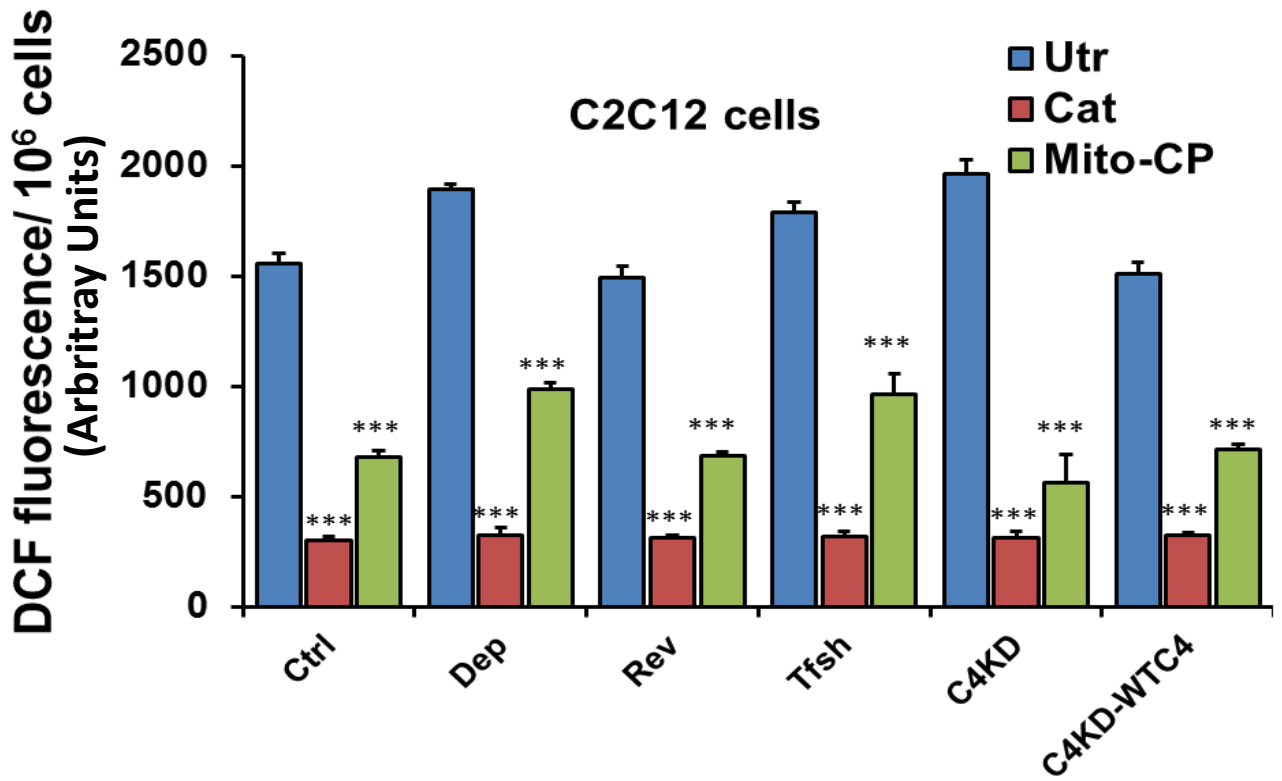

B

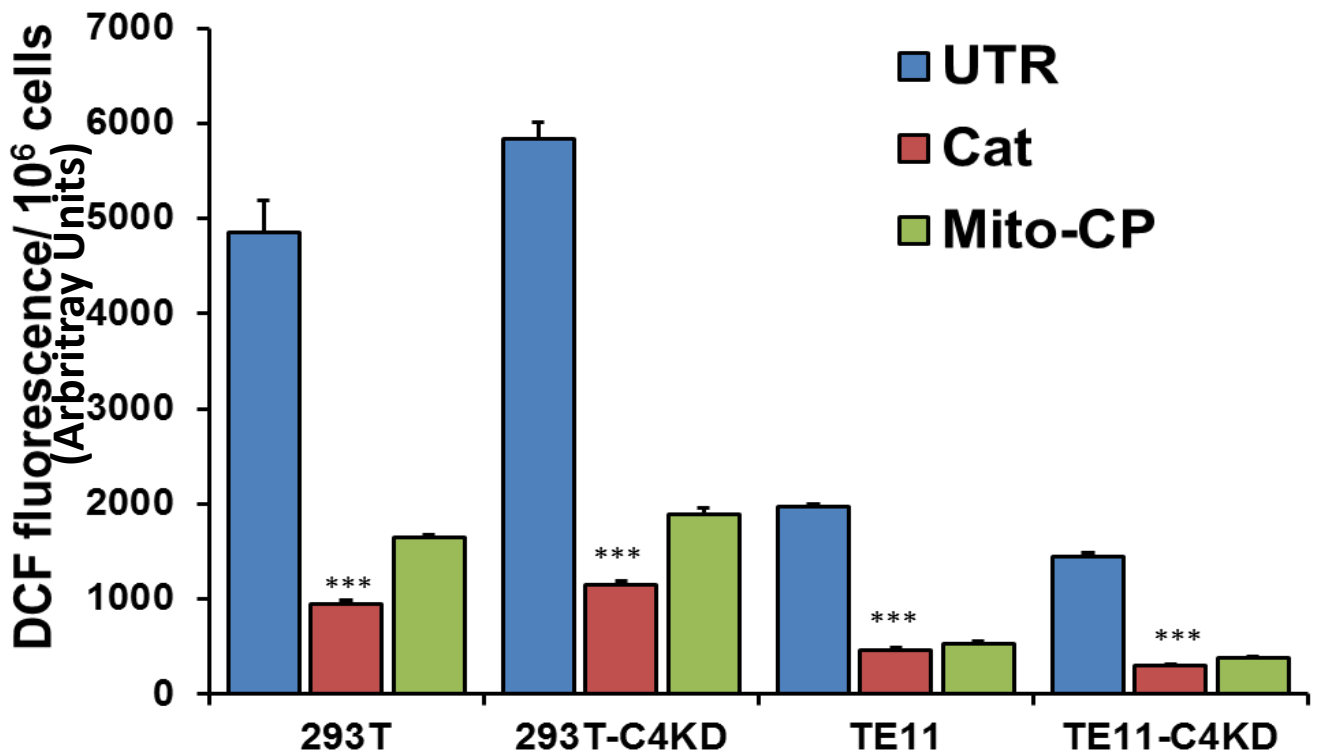

Supplement: pone.0206897.s003.pdf [file pone.0206897.s003.pdf]
