# Supplementary material for: hnRNPA2 mediated acetylation reduces telomere length in response to mitochondrial dysfunction
Source: PubMed Central journal article supplement (PMC6241121; doi:10.1371/journal.pone.0206897), 2018-11-14
Supplement: pone.0206897.s005.pdf [file pone.0206897.s005.pdf]

Supplemental Figure 5

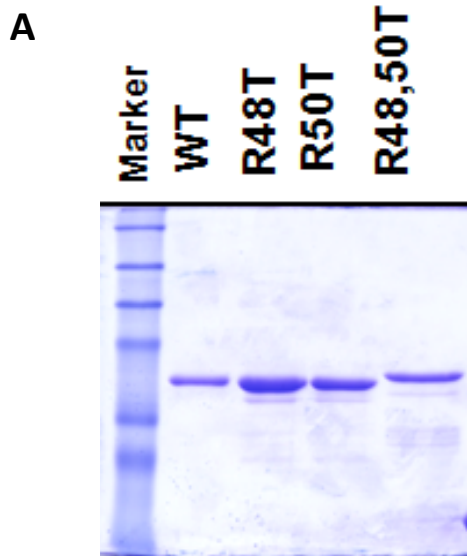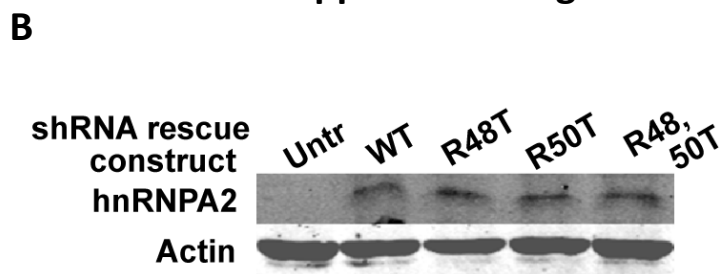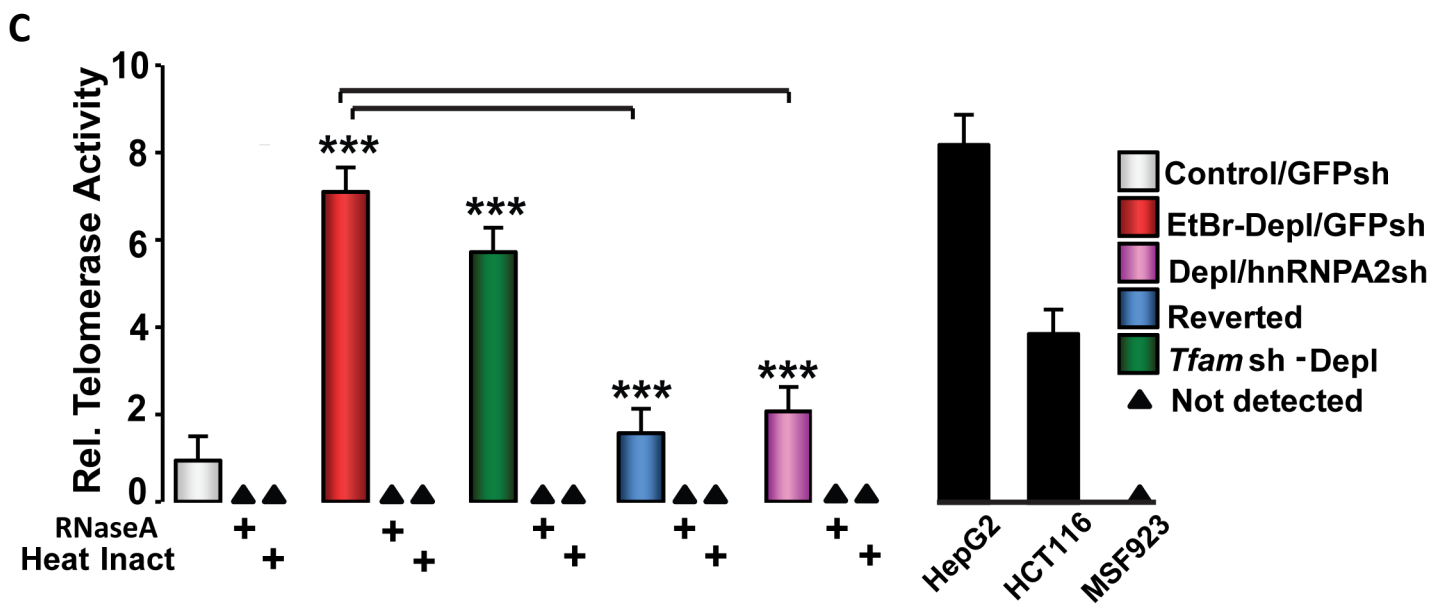

Adapted from Guha et al Cell Discov. 2016 Dec 6;2:16045.
